# Supplementary material for: Genome-Wide Identification and Functional Characterization of Stress Related Glyoxalase Genes in Brassica napus L
Source: MDPI journal article supplement (doi:10.3390/ijms24032130), 2023-01-21
Supplement: s1 [file s1]

## Supplementary Materials

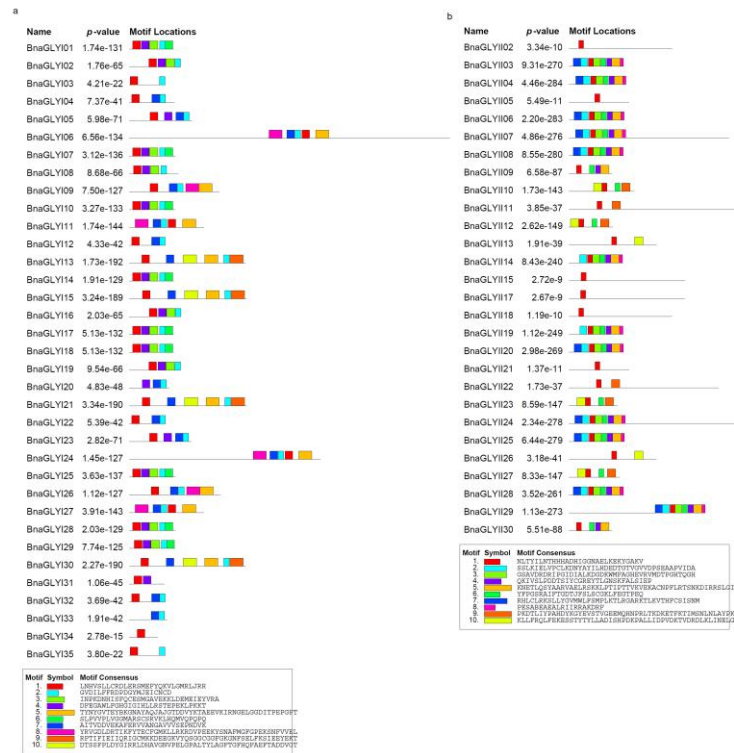

**Figure S1. The conserved Motif of BnaGLY proteins (a) and BnaGLYII (b) proteins.**

a

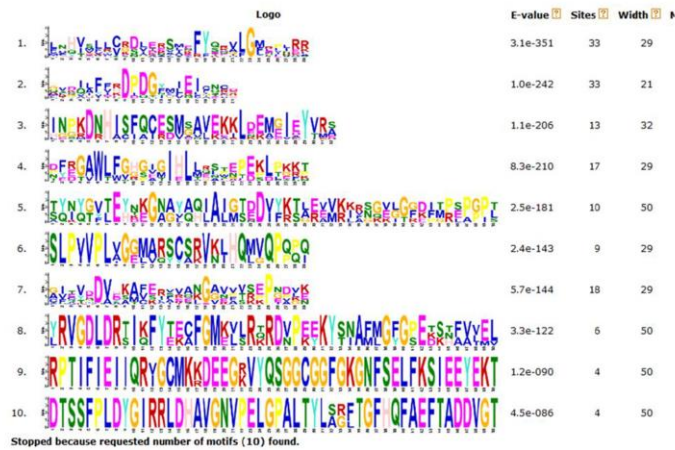

b

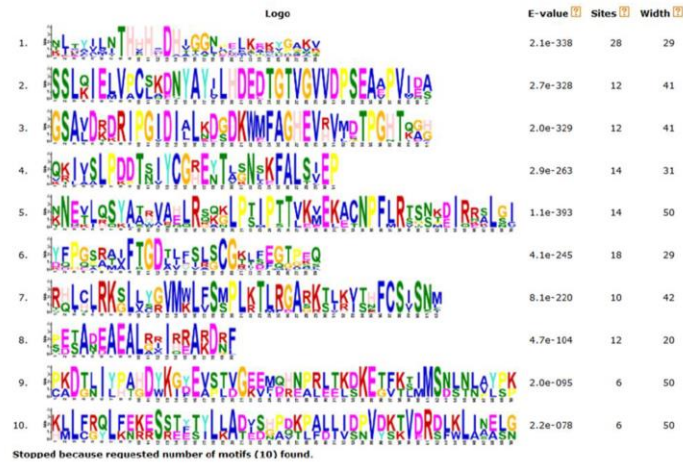

**Figure S2. Sequence logo view of the consensus BnaGLYI (a) and BnaGLYII (b) protein motifs in *B. napus*.** The height of a letter indicates its relative frequency at the given position.

a

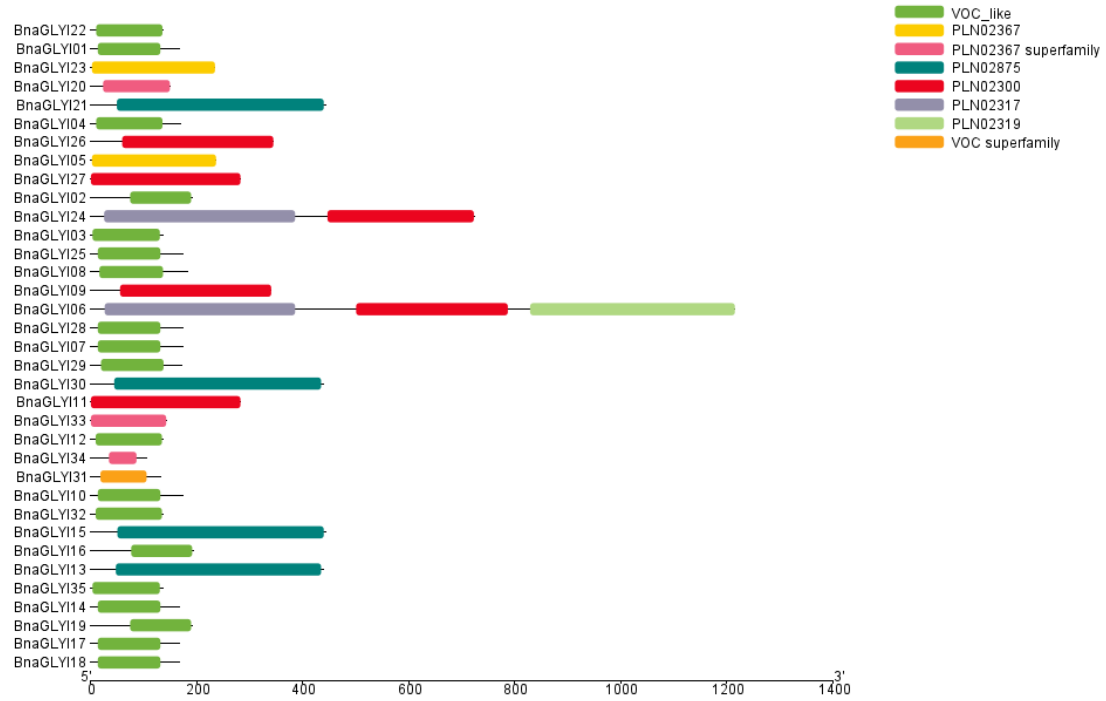

b

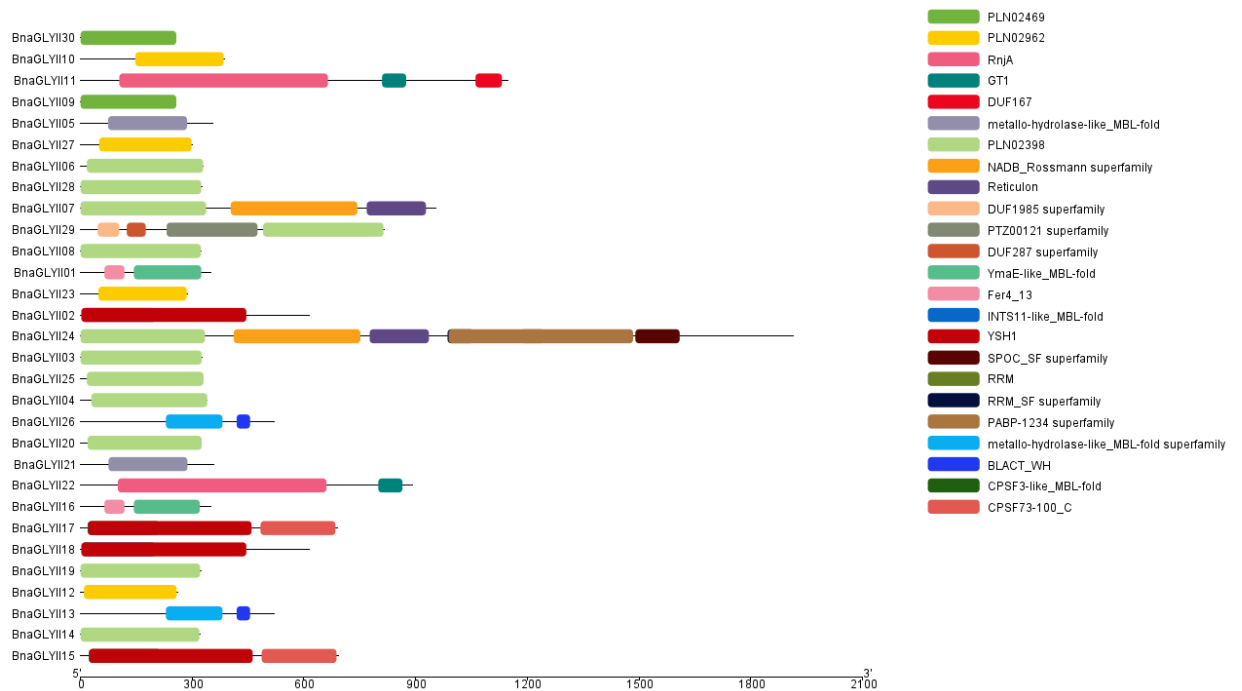

**Figure S3. Conserved domain structure of BnaGLYI (a) and BnaGLYII (b) protein**

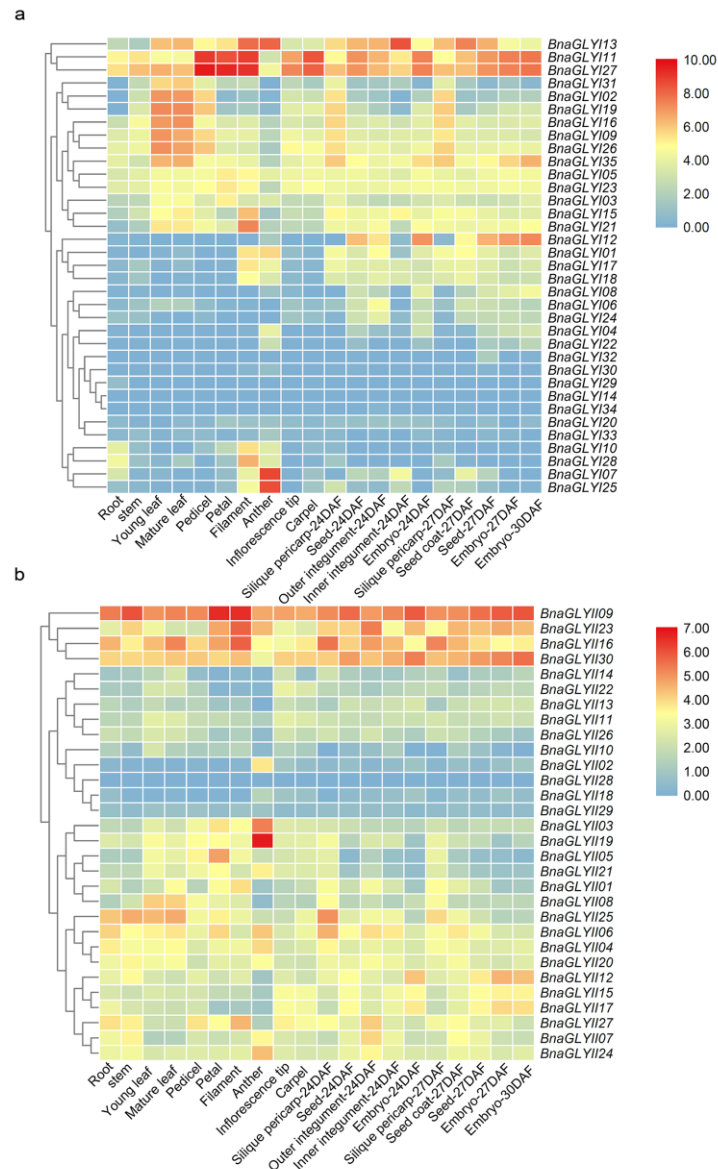

**Figure S4. Expression patterns of the *BnaGLY* genes across various tissues and organs.** (a) The expression profiles of the *BnaGLYI* genes; (b) The expression profiles of the *BnaGLYII* genes.

The expression level of the *BnaGLY* genes root, stem, young leaf, mature leaf, pedicel, petal, filament, anther, inflorescence tip, and carpel, silique pericarp-24 DAF, seed-24 DAF, outer integument-24 DAF, inner integument-24 DAF, embryo-24 DAF, silique pericarp-27 DAF, seed coat-27 DAF, seed-27 DAF, embryo-27 DAF and embryo-30 DAF. The RNA-seq data was obtained from BrassicaEDB database (<https://biodb.swu.edu.cn/brassica/>). The Heatmap was generated by Heatmap Illustrator (HemI, <http://hemi.biocuckoo.org/down.php>) package. The color bar at the upper right side of the figure represents  $\log_2(\text{FPKM} + 1)$ , with blue representing little or no expression.

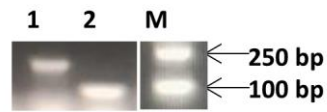

- 1: PCR product amplified with *BnGLYI29* qRT-PCR primer-pairs using genomic DNA as template (238 bp)  
 2: PCR product amplified with *BnGLYI28* qRT-PCR primer-pairs using genomic DNA as template (86 bp)  
 M: Marker

**Figure S5. PCR product amplified with *BnaGLY* genomic DNA as templates to verify qRT-PCR results of the expression genes**

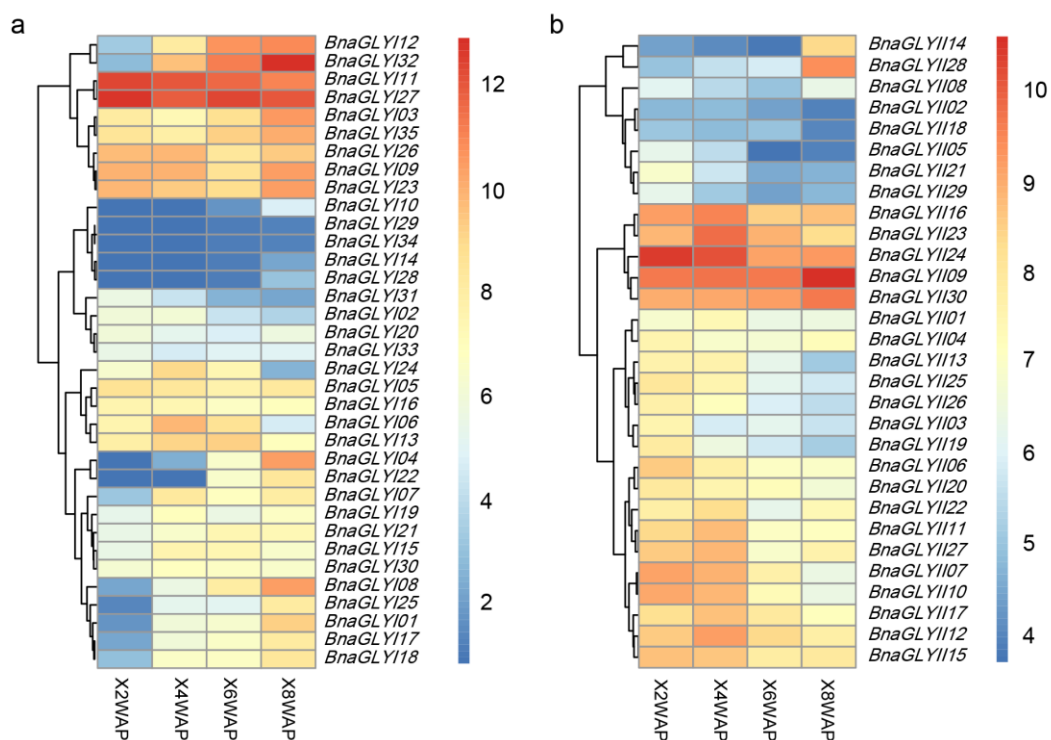

**Figure S6. The expression patterns of the *BnaGLY* genes at different seed development times.**

a: The expressions of the *BnaGLYI* genes, b: The expressions of the *BnaGLYII* genes

The expression levels of *BnaGLY* in developing seeds at two, four, six and eight weeks after pollination (WAP) were analyzed using the gene expression omnibus (GEO) database (GSE77637)

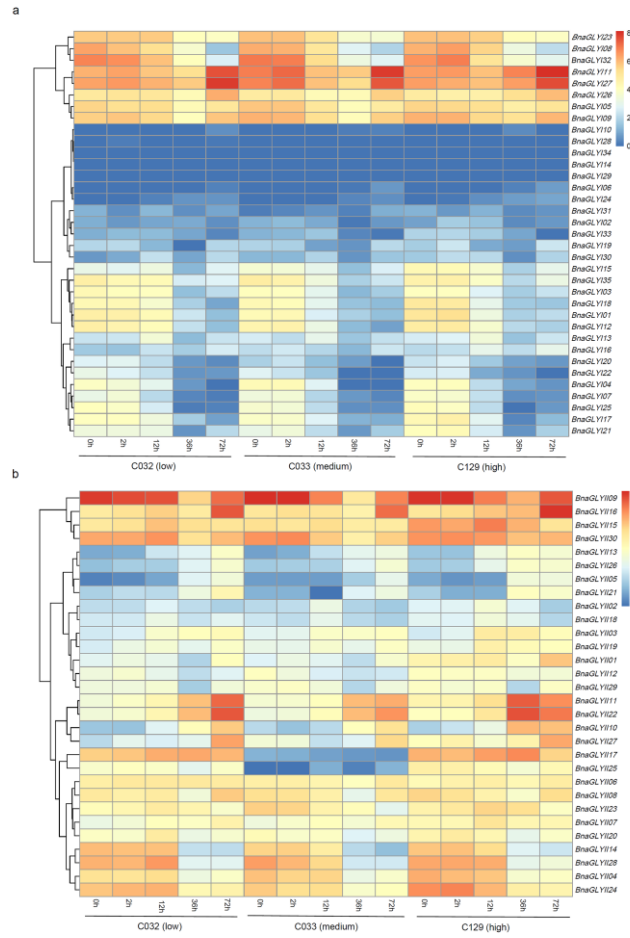

**Figure S7. The expressions profiles of the *BnaGLY* genes during seed germination.**

a: The expressions of the *BnaGLYI* genes, b: The expressions of the *BnaGLYII* genes

The expression level of *GLY* genes in different seed germination period (0h, 2h, 12h, 36h and 72h) of *B.*

*napus* with different germination rates (high, medium and low; C129, C033 and C032, respectively)

using the data in GEO (GSE13723).

**Table S1 | Ka and Ks values for *BnaGLYI* paralogous gene pairs**

| No | Locus 1   | Locus 2   | Ks     | Ka     | Ka/Ks   | Selection pressure  | Average Ka/Ks |
|----|-----------|-----------|--------|--------|---------|---------------------|---------------|
| 1  | BnaGLYI11 | BnaGLYI27 | 0.0482 | 0.0514 | 1.0664  | Positive selection  | 1.8559        |
| 2  | BnaGLYI14 | BnaGLYI29 | 0.0977 | 0.0384 | 0.3930  | Purifying selection |               |
| 3  | BnaGLYI30 | BnaGLYI15 | 0.036  | 0.1499 | 4.1639  | Positive selection  |               |
| 4  | BnaGLYI30 | BnaGLYI21 | 0.0362 | 0.1173 | 3.2403  | Positive selection  |               |
| 5  | BnaGLYI32 | BnaGLYI04 | 0.0744 | 0.1663 | 2.2352  | Positive selection  |               |
| 6  | BnaGLYI32 | BnaGLYI22 | 0.0728 | 0.1182 | 1.6236  | Positive selection  |               |
| 7  | BnaGLYI03 | BnaGLYI35 | 0.079  | 0.0134 | 0.1696  | Purifying selection |               |
| 8  | BnaGLYI33 | BnaGLYI05 | 0.1198 | 0.2261 | 1.8873  | Positive selection  |               |
| 9  | BnaGLYI33 | BnaGLYI23 | 0.1184 | 0.2442 | 2.0625  | Purifying selection |               |
| 10 | BnaGLYI19 | BnaGLYI02 | 0.0418 | 0.013  | 0.3110  | Purifying selection |               |
| 11 | BnaGLYI07 | BnaGLYI10 | 0.2567 | 0.1386 | 0.5399  | Purifying selection |               |
| 12 | BnaGLYI07 | BnaGLYI28 | 0.2567 | 0.1236 | 0.48150 | Purifying selection |               |
| 13 | BnaGLYI25 | BnaGLYI10 | 0.3206 | 0.1386 | 0.4323  | Purifying selection |               |
| 14 | BnaGLYI25 | BnaGLYI28 | 1.3206 | 0.1236 | 0.0936  | Purifying selection |               |
| 15 | BnaGLYI23 | BnaGLYI05 | 0.0928 | 0.066  | 0.7112  | Purifying selection |               |
| 16 | BnaGLYI22 | BnaGLYI12 | 0.0364 | 0.2007 | 5.5137  | Positive selection  |               |
| 17 | BnaGLYI10 | BnaGLYI28 | 0.0448 | 0.0128 | 0.2857  | Purifying selection |               |
| 18 | BnaGLYI13 | BnaGLYI15 | 0.0358 | 0.1339 | 3.7402  | Positive selection  |               |
| 19 | BnaGLYI12 | BnaGLYI04 | 0.0372 | 0.2348 | 6.3118  | Positive selection  |               |



**Table S2 | Ka and Ks values for *BnaGLYII* paralogous gene pairs**

| No | Locus 1    | Locus 2    | Ks      | Ka      | Ka/Ks  | Selection pressure  | Average Ka/Ks |
|----|------------|------------|---------|---------|--------|---------------------|---------------|
| 1  | BnaGLYII09 | BnaGLYII30 | 0.12470 | 0.05000 | 0.4010 | Purifying selection | 0.7978        |
| 2  | BnaGLYII24 | BnaGLYII04 | 0.05800 | 0.06350 | 1.0948 | Positive selection  |               |
| 3  | BnaGLYII24 | BnaGLYII07 | 0.02070 | 0.02720 | 1.3140 | Positive selection  |               |
| 4  | BnaGLYII29 | BnaGLYII03 | 0.11980 | 0.08840 | 0.7379 | Purifying selection |               |
| 5  | BnaGLYII29 | BnaGLYII08 | 0.03070 | 0.03670 | 1.1954 | Positive selection  |               |
| 6  | BnaGLYII25 | BnaGLYII06 | 0.11250 | 0.03930 | 0.3493 | Purifying selection |               |
| 7  | BnaGLYII19 | BnaGLYII08 | 0.12060 | 0.07830 | 0.6493 | Purifying selection |               |
| 8  | BnaGLYII19 | BnaGLYII03 | 0.04170 | 0.02420 | 0.5803 | Purifying selection |               |
| 9  | BnaGLYII10 | BnaGLYII27 | 0.08610 | 0.03340 | 0.3879 | Purifying selection |               |
| 10 | BnaGLYII10 | BnaGLYII12 | 0.19390 | 0.10200 | 0.5260 | Purifying selection |               |
| 11 | BnaGLYII02 | BnaGLYII18 | 0.01030 | 0.00890 | 0.8641 | Purifying selection |               |
| 12 | BnaGLYII28 | BnaGLYII14 | 0.07520 | 0.05860 | 0.7793 | Purifying selection |               |
| 13 | BnaGLYII23 | BnaGLYII12 | 0.05060 | 0.03380 | 0.6680 | Purifying selection |               |
| 14 | BnaGLYII08 | BnaGLYII03 | 0.13160 | 0.07190 | 0.5464 | Purifying selection |               |
| 15 | BnaGLYII11 | BnaGLYII22 | 0.04280 | 0.03320 | 0.7757 | Purifying selection |               |
| 16 | BnaGLYII15 | BnaGLYII17 | 0.05250 | 0.01200 | 0.2286 | Purifying selection |               |
| 17 | BnaGLYII13 | BnaGLYII26 | 0.06540 | 0.04560 | 0.6973 | Purifying selection |               |
| 18 | BnaGLYII20 | BnaGLYII04 | 0.01020 | 0.03350 | 3.2843 | Positive selection  |               |
| 19 | BnaGLYII20 | BnaGLYII24 | 0.06890 | 0.07010 | 1.0174 | Positive selection  |               |
| 20 | BnaGLYII27 | BnaGLYII12 | 0.18670 | 0.08020 | 0.4296 | Purifying selection |               |
| 21 | BnaGLYII01 | BnaGLYII16 | 0.06060 | 0.04020 | 0.6634 | Purifying selection |               |
| 22 | BnaGLYII21 | BnaGLYII05 | 0.03470 | 0.00580 | 0.1672 | Purifying selection |               |
| 23 | BnaGLYII07 | BnaGLYII04 | 0.08040 | 0.07980 | 0.9925 | Purifying selection |               |

**Table S3 | Analysis of the putative BnaGLYI for their activity and metal ion dependency**

| Proteins  | Metal binding sites Expected GLYI |   |     |   | Expected GLYI enzyme activity |
|-----------|-----------------------------------|---|-----|---|-------------------------------|
|           | H/Q                               | E | H/Q | E |                               |
| BnaGLYI1  | √                                 | √ | √   | √ | Yes                           |
| BnaGLYI2  | √                                 | — | √   | √ | No                            |
| BnaGLYI3  | √                                 | — | √   | √ | No                            |
| BnaGLYI4  | —                                 | √ | —   | — | No                            |
| BnaGLYI5  | √                                 | √ | √   | √ | Yes                           |
| BnaGLYI6  | √                                 | √ | √   | √ | Yes                           |
| BnaGLYI7  | √                                 | √ | √   | √ | Yes                           |
| BnaGLYI8  | √                                 | — | √   | √ | No                            |
| BnaGLYI9  | √                                 | √ | √   | √ | Yes                           |
| BnaGLYI10 | √                                 | √ | √   | √ | Yes                           |
| BnaGLYI11 | √                                 | √ | √   | √ | Yes                           |
| BnaGLYI12 | —                                 | √ | —   | — | No                            |
| BnaGLYI13 | √                                 | — | —   | — | No                            |
| BnaGLYI14 | √                                 | √ | √   | √ | Yes                           |
| BnaGLYI15 | √                                 | — | —   | — | No                            |
| BnaGLYI16 | √                                 | — | √   | √ | No                            |
| BnaGLYI17 | √                                 | √ | √   | √ | Yes                           |
| BnaGLYI18 | √                                 | √ | √   | √ | Yes                           |
| BnaGLYI19 | √                                 | — | √   | √ | No                            |
| BnaGLYI20 | —                                 | √ | —   | √ | No                            |
| BnaGLYI21 | √                                 | — | —   | — | No                            |
| BnaGLYI22 | —                                 | √ | —   | — | No                            |
| BnaGLYI23 | √                                 | √ | √   | √ | Yes                           |
| BnaGLYI24 | √                                 | — | √   | √ | No                            |
| BnaGLYI25 | √                                 | √ | √   | √ | Yes                           |
| BnaGLYI26 | √                                 | √ | √   | √ | Yes                           |
| BnaGLYI27 | √                                 | √ | √   | √ | Yes                           |
| BnaGLYI28 | √                                 | √ | √   | √ | Yes                           |
| BnaGLYI29 | √                                 | √ | √   | √ | Yes                           |
| BnaGLYI30 | √                                 | — | —   | — | No                            |
| BnaGLYI31 | √                                 | — | √   | — | No                            |
| BnaGLYI32 | —                                 | √ | —   | — | No                            |
| BnaGLYI33 | —                                 | √ | √   | √ | No                            |
| BnaGLYI34 | —                                 | — | —   | — | No                            |
| BnaGLYI35 | √                                 | — | √   | √ | No                            |

**Table S4 | Analyses of the putative BnaGLYII proteins for their activity and conserved motifs**

| <b>Proteins</b> | <b>Conserved metal binding motif (THHHXDH)</b> | <b>Active site motif (C/GHT)</b> | <b>Proteins Expected GLYII enzyme activity</b> |
|-----------------|------------------------------------------------|----------------------------------|------------------------------------------------|
| BnaGLYII1       | —                                              | √                                | No                                             |
| BnaGLYII2       | —                                              | —                                | No                                             |
| BnaGLYII3       | √                                              | √                                | Yes                                            |
| BnaGLYII4       | √                                              | √                                | Yes                                            |
| BnaGLYII5       | —                                              | —                                | No                                             |
| BnaGLYII6       | √                                              | —                                | No                                             |
| BnaGLYII7       | √                                              | √                                | Yes                                            |
| BnaGLYII8       | √                                              | √                                | Yes                                            |
| BnaGLYII9       | —                                              | √                                | No                                             |
| BnaGLYII10      | —                                              | √                                | No                                             |
| BnaGLYII11      | —                                              | —                                | No                                             |
| BnaGLYII12      | —                                              | √                                | No                                             |
| BnaGLYII13      | √                                              | √                                | Yes                                            |
| BnaGLYII14      | √                                              | √                                | Yes                                            |
| BnaGLYII15      | —                                              | —                                | No                                             |
| BnaGLYII16      | —                                              | √                                | No                                             |
| BnaGLYII17      | —                                              | —                                | No                                             |
| BnaGLYII18      | —                                              | —                                | No                                             |
| BnaGLYII19      | √                                              | √                                | Yes                                            |
| BnaGLYII20      | √                                              | √                                | Yes                                            |
| BnaGLYII21      | —                                              | —                                | No                                             |
| BnaGLYII22      | —                                              | —                                | No                                             |
| BnaGLYII23      | —                                              | √                                | No                                             |
| BnaGLYII24      | √                                              | √                                | Yes                                            |
| BnaGLYII25      | √                                              | √                                | Yes                                            |
| BnaGLYII26      | √                                              | √                                | Yes                                            |
| BnaGLYII27      | —                                              | √                                | No                                             |
| BnaGLYII28      | √                                              | √                                | Yes                                            |
| BnaGLYII29      | √                                              | √                                | Yes                                            |
| BnaGLYII30      | √                                              | √                                | Yes                                            |

Table S5. The DNA sequences of *BnaGLY* genes in *B. napus*.

Table S6. The coding sequences of *BnaGLY* genes in *B. napus*.

Table S7. The amino acid sequences of *BnaGLY* genes in *B. napus*.

Table S8. The CT values of the genes (*BnaGLYI29* *BnaGLYII28* and their corresponding *ACTIN*)

Table S9. The expression level of *BnaGLYI* and *BnaGLYII* family genes under heat and drought stresses.

Table S10. The expression level of *BnaGLYI* and *BnaGLYII* family genes under low temperature stresses.

Table S11. Percentage of similarities among all GLYI proteins used in the phylogenetic analysis

Table S12. Pairwise similarities among GLYII proteins used in the phylogenetic analysis
